# Supplementary material for: A New Preclinical Model of Retinitis Pigmentosa Due to Pde6g Deficiency
Source: PubMed Central journal article supplement — Ophthalmol Sci. 2023 May 16;3(4):100332. doi: 10.1016/j.xops.2023.100332 (PMC10285708; doi:10.1016/j.xops.2023.100332), 2023-05-16
Supplement: mmc1.pdf [file mmc1.pdf]

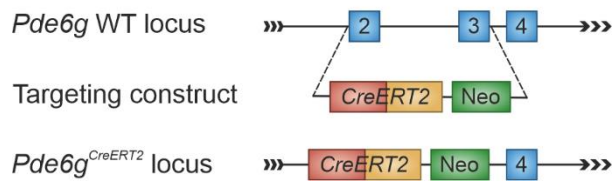

**Figure S1: Targeting strategy of *Pde6g*<sup>CreERT2</sup> line.** The *Pde6g* WT locus comprises 5 exons. Exons 2–4 are represented by blue boxes. In the targeting construct, exons 2 and 3 were replaced by *CreERT2* and a neo/tk cassette (*Neo*).
