# Supplementary material for: A New Preclinical Model of Retinitis Pigmentosa Due to Pde6g Deficiency
Source: PubMed Central journal article supplement — Ophthalmol Sci. 2023 May 16;3(4):100332. doi: 10.1016/j.xops.2023.100332 (PMC10285708; doi:10.1016/j.xops.2023.100332), 2023-05-16
Supplement: mmc2.pdf [file mmc2.pdf]

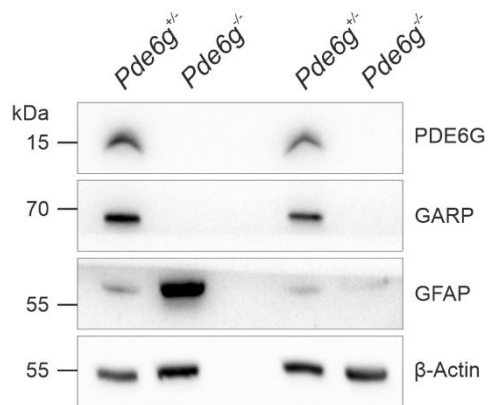

**Figure S4: *Pde6g* deficiency results in Müller cell gliosis and loss of rod outer segments.**

Immunoblot of P30 retinal lysates.  $\beta$ -actin, loading control. GARP, glutamic-acid-rich protein; GFAP, glial fibrillary acidic protein.
