# Supplementary material for: A New Preclinical Model of Retinitis Pigmentosa Due to Pde6g Deficiency
Source: PubMed Central journal article supplement — Ophthalmol Sci. 2023 May 16;3(4):100332. doi: 10.1016/j.xops.2023.100332 (PMC10285708; doi:10.1016/j.xops.2023.100332), 2023-05-16
Supplement: mmc3.pdf [file mmc3.pdf]

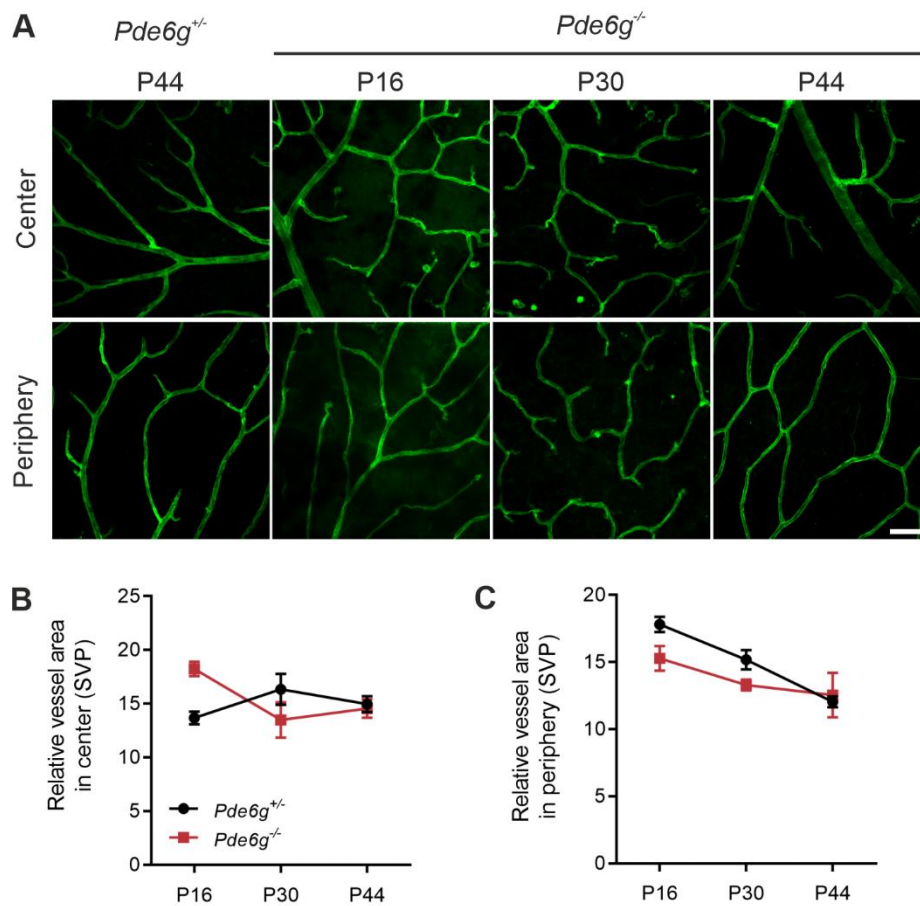

**Figure S6: Retinal superficial blood vessel degeneration in *Pde6g*<sup>-/-</sup> mice.** (A) Retinal flatmounts were immunostained for isolectin GS-IB4. Quantification of SVP blood vessels in retinal (B) center and (C) periphery: P16 (n=2-3), P30 (n=3-4) and P44 (n=5). Data presented as mean ± SEM. *Pde6g*<sup>-/-</sup> vs. *Pde6g*<sup>+/+</sup> age-matched group means were compared by unpaired t-tests. SVP, superficial vascular plexus. Scale bar, 50 μm.
